# Supplementary material for: Salivary DNA Methylation as an Epigenetic Biomarker for Head and Neck Cancer. Part II: A Cancer Risk Meta-Analysis
Source: MDPI journal article supplement (doi:10.3390/jpm11070606), 2021-06-26
Supplement: s1 [file s1]

## Supplementary Material

### Salivary DNA methylation as an epigenetic biomarker for head and neck cancer. Part II: A cancer risk meta-analysis

Óscar Rapado-González, Cristina Martínez-Reglero, Ángel Salgado-Barreira, María Arminda Santos, Rafael López-López, Ángel Díaz-Lagares and María Mercedes Suárez-Cunqueiro

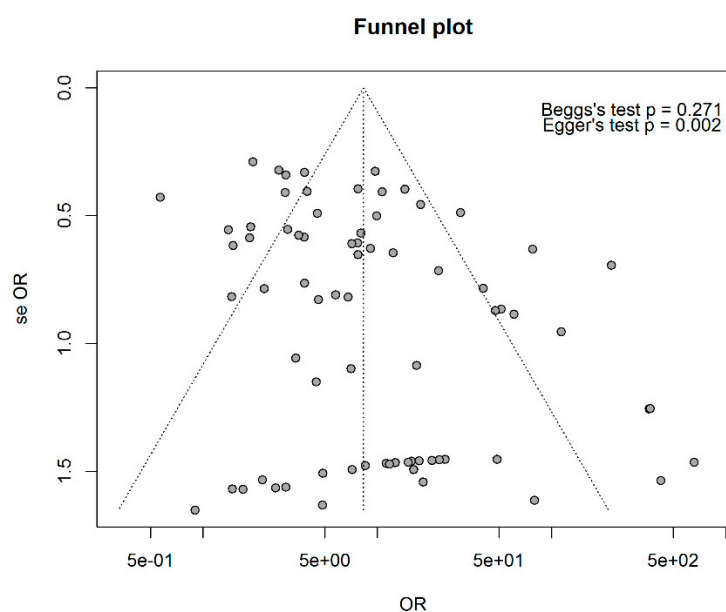

**Figure S1.** Funnel plot for studies (of 18 studies) on the association between salivary DNA hypermethylation and HNC. *Abbreviations:* HNC = head and neck cancer.

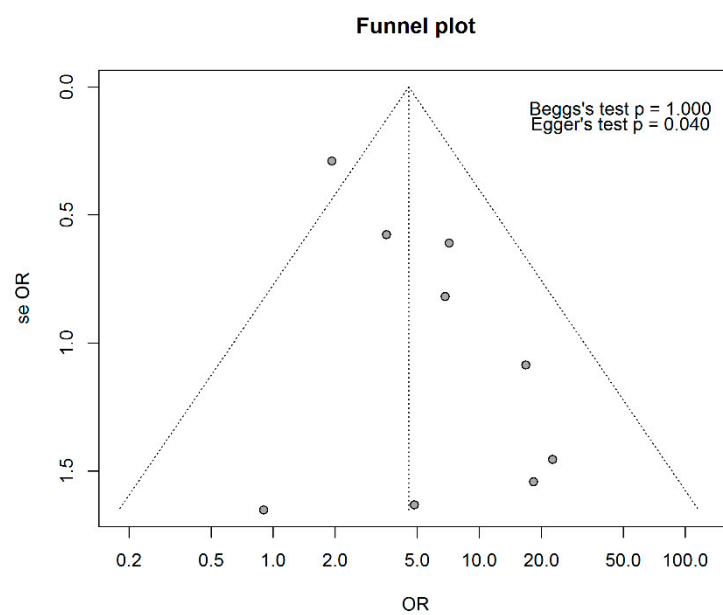

**Figure S2.** Funnel plot for studies (of 9 studies) on the association between salivary hypermethylation of *p16* gene promoter and HNC. *Abbreviations:* HNC = head and neck cancer.

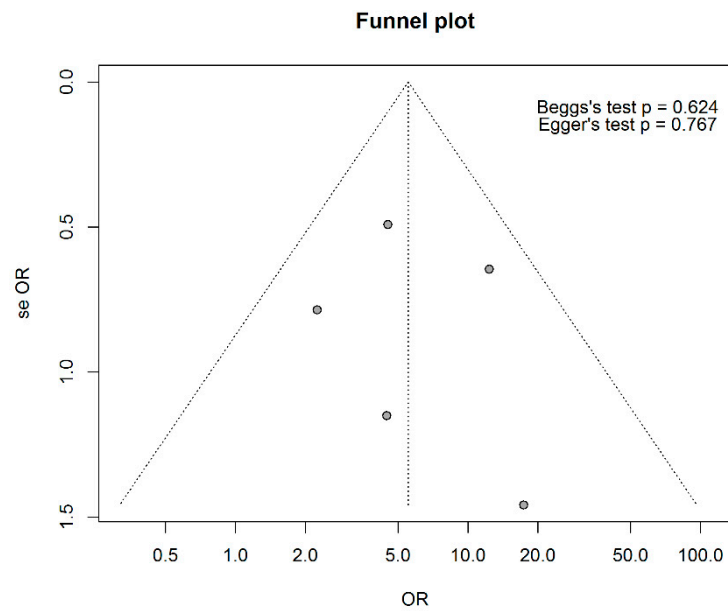

**Figure S3.** Funnel plot for studies (of 5 studies) on the association between salivary hypermethylation of *MGMT* gene promoter and HNC. Abbreviations: HNC = head and neck cancer.

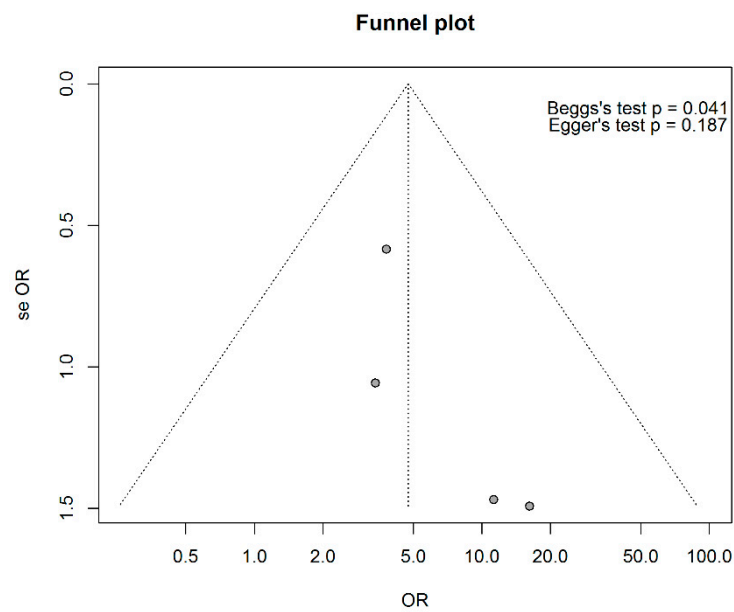

**Figure S4.** Funnel plot for studies (of 4 studies) on the association between salivary hypermethylation of *DAPK* gene promoter and HNC. Abbreviations: HNC = head and neck cancer.

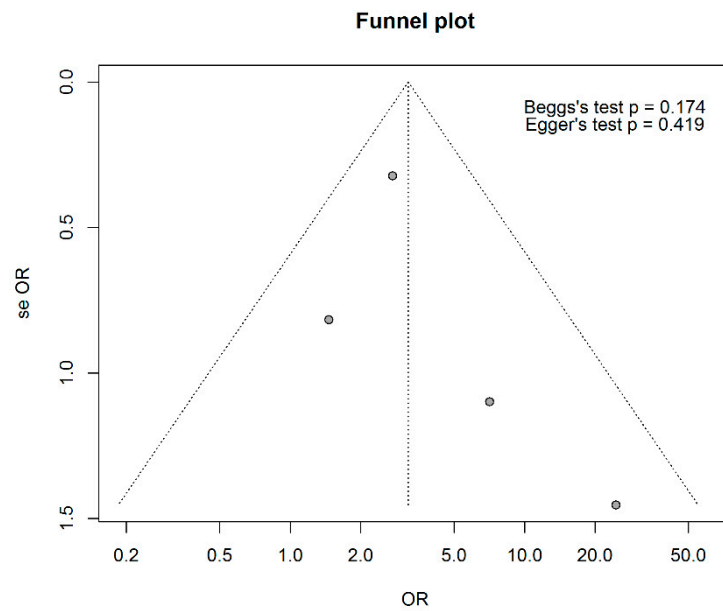

**Figure S5.** Funnel plot for studies (of 4 studies) on the association between salivary hypermethylation of *TIMP3* gene promoter and HNC. Abbreviations: HNC = head and neck cancer.

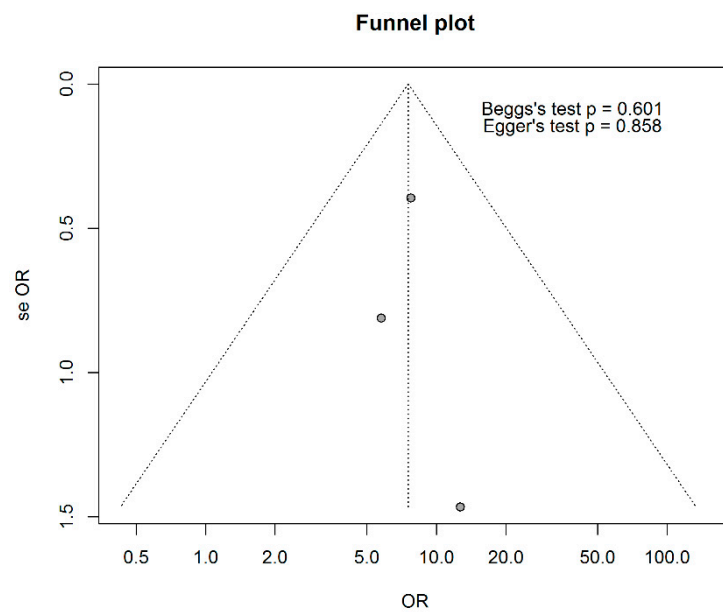

**Figure S6.** Funnel plot for studies (of 3 studies) on the association between salivary hypermethylation of *RASSF1A* gene promoter and HNC. *Abbreviations:* HNC = head and neck cancer.

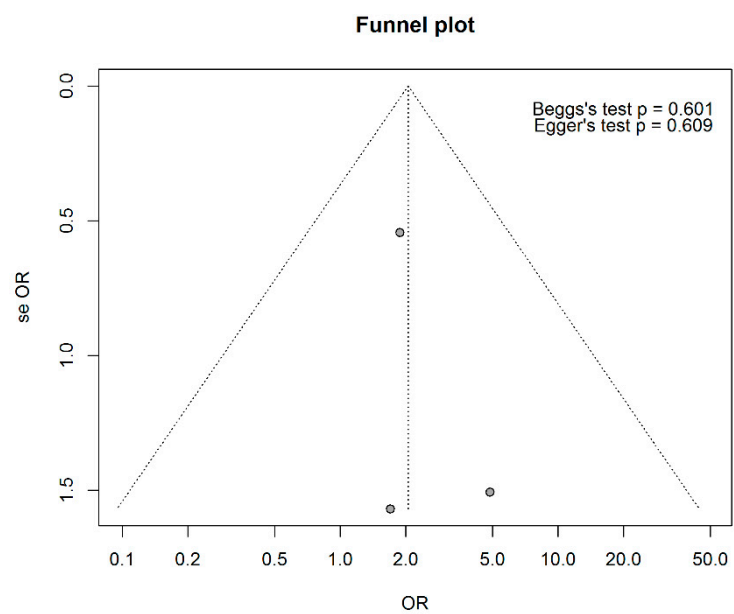

**Figure S7.** Funnel plot for studies (of 3 studies) on the association between salivary hypermethylation of *APC* gene promoter and HNC. *Abbreviations:* HNC = head and neck cancer.

**Table S1.** The Newcastle-Ottawa Scale (NOS) for assessing the quality of included studies.

| Study                         | Subject Selection<br>(Max. 4★) | Study Comparability<br>(Max. 2★) | Ascertainment of exposure<br>(Max. 3★) | Final quality assessment |
|-------------------------------|--------------------------------|----------------------------------|----------------------------------------|--------------------------|
| Rosas et al.; 2001            | ★★★★                           | 0                                | ★★★                                    | 7                        |
| Righini et al.; 2007          | ★★★★                           | 0                                | ★★★                                    | 7                        |
| Franzmann et al.; 2007        | ★★                             | ★★                               | ★★★                                    | 7                        |
| Guerrero-Preston et al.; 2011 | ★★★★                           | 0                                | ★★★                                    | 7                        |
| Nagata et al.; 2012           | ★★★★                           | 0                                | ★★★                                    | 7                        |
| Ovchinnikov et al.; 2012      | ★★★★                           | 0                                | ★★★                                    | 7                        |
| Ksumoto et al.; 2012          | ★★★★                           | 0                                | ★★★                                    | 7                        |
| Rettori et al.; 2012          | ★★★★                           | 0                                | ★★★                                    | 7                        |
| Ovchinnikov et al.; 2014      | ★★★★                           | 0                                | ★★★                                    | 7                        |
| Gaykalova et al.; 2015        | ★★★★                           | 0                                | ★★★                                    | 7                        |
| Lim et al.; 2016              | ★★★★                           | 0                                | ★★★                                    | 7                        |
| Ferlazzo et al.; 2017         | ★★★★                           | ★★                               | ★★★                                    | 9                        |
| Cheng et al.; 2017            | ★★★★                           | 0                                | ★★★                                    | 7                        |
| Puttipanyalears et al.; 2018  | ★★★★                           | 0                                | ★★★                                    | 7                        |
| Liyanage et al.; 2020         | ★★★★                           | ★★                               | ★★★                                    | 9                        |
| Srisutte et al.; 2020         | ★★★★                           | ★                                | ★★★                                    | 8                        |
| Shen et al.; 2020             | ★★★★                           | 0                                | ★★★                                    | 7                        |
| González-Pérez et al.; 2020   | ★★★★                           | ★                                | ★★★                                    | 8                        |

Note: “★” means one point



**Table S2.** Subgroup analysis of salivary DNA methylation for HNC detection based on different covariates.

*Abbreviations:* HNC = head and neck cancer; OC = oral cancer; OPC = oropharyngeal cancer; MSP = methylation-specific polymerase chain reaction; qMSP = quantitative-MSP.

| Subgroups        | No of study units | Sample size (cases/controls) | Heterogeneity      |          | Mode I | Effect size            |         |
|------------------|-------------------|------------------------------|--------------------|----------|--------|------------------------|---------|
|                  |                   |                              | I <sup>2</sup> (%) | P-Q-test |        | OR (95% CI)            | P-value |
| Sample type      |                   |                              |                    |          |        |                        |         |
| Saliva           | 16                |                              | 79                 | <0.01    | R      | 6.33<br>(3.90–10.27)   | <0.01   |
| Oral Rinse       | 58                |                              | 68                 | <0.01    |        | 9.42<br>(6.30–14.08)   | <0.01   |
| Samples size     |                   |                              |                    |          |        |                        |         |
| N>100            | 25                |                              | 84                 | <0.01    | R      | 8.34<br>(6.10–11.39)   | <0.01   |
| N<100            | 49                |                              | 53                 | <0.01    |        | 9.58<br>(6.44–14.27)   | <0.01   |
| Tumor Location   |                   |                              |                    |          |        |                        |         |
| HNC              | 43                |                              | 70                 | <0.01    | R      | 5.78<br>(3.86–8.67)    | <0.01   |
| OC               | 33                |                              | 73                 | <0.01    |        | 13.07<br>(8.19–20.88)  | <0.01   |
| OPC              | 8                 |                              | 80                 | <0.01    |        | 13.26<br>(3.17–5.42)   | <0.01   |
| Technique        |                   |                              |                    |          |        |                        |         |
| MSP              | 48                |                              | 70                 | <0.01    | R      | 9.06<br>(6.30–13.03)   | <0.01   |
| qMSP             | 26                |                              | 75                 | <0.01    |        | 6.81<br>(3.70–12.54)   | <0.01   |
| Gene profiling   |                   |                              |                    |          |        |                        |         |
| Single gene      | 62                |                              | 63                 | <0.01    | R      | 6.02<br>(4.46–8.13)    | <0.01   |
| Combination gene | 12                |                              | 74                 | <0.01    |        | 36.79<br>(16.81–81.32) | <0.01   |
